# Supplementary material for: Photoluminescent Polymer Aerogels with R, G and B Emission
Source: MDPI journal article supplement (doi:10.3390/ijms232416004), 2022-12-15
Supplement: s1 [file s1]

## Supplemental Information

### 1. Thermal Investigation

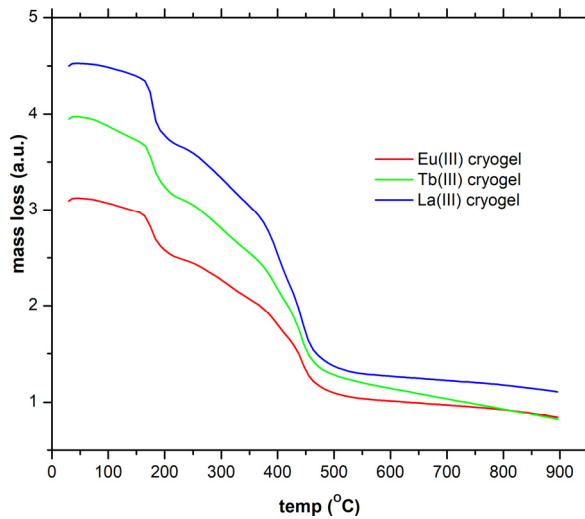

**Figure S1.** Thermal analysis of the prepared Eu(III), Tb(III) and La(III) aerogels.

## 2. XPS Investigation

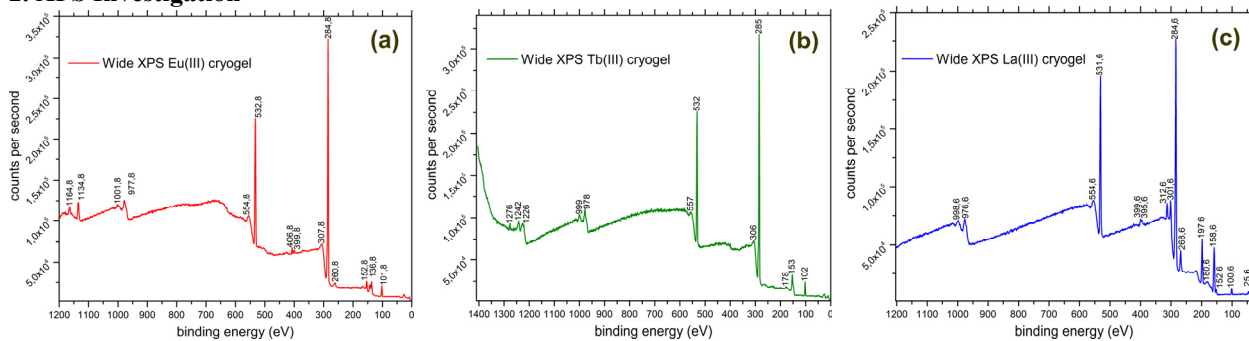

**Figure S2.** Recorded wide XPS spectra for (a) Eu(III) aerogel, (b) Tb(III) aerogel, (c) La(III) aerogel.

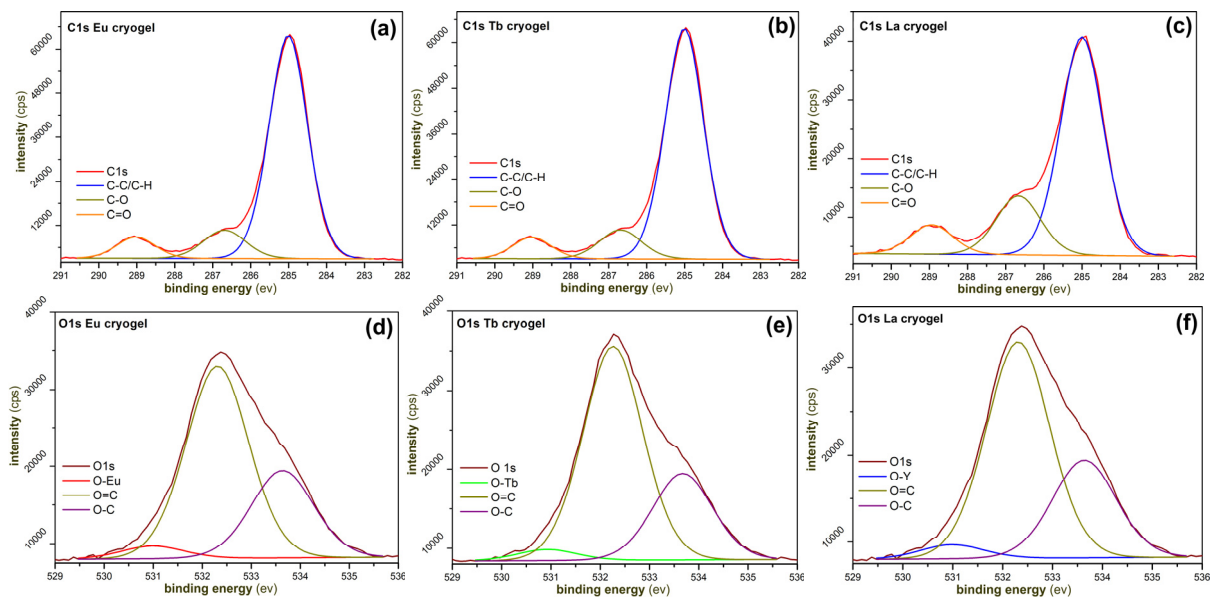

**Figure S3.** Recorded high resolution XPS spectra C1s (a) Eu(III) aerogel, (b) Tb(III) aerogel, (c) La(III) aerogel and O1s (d) Eu(III) aerogel, (e) Tb(III) aerogel, (f) La(III) aerogel.

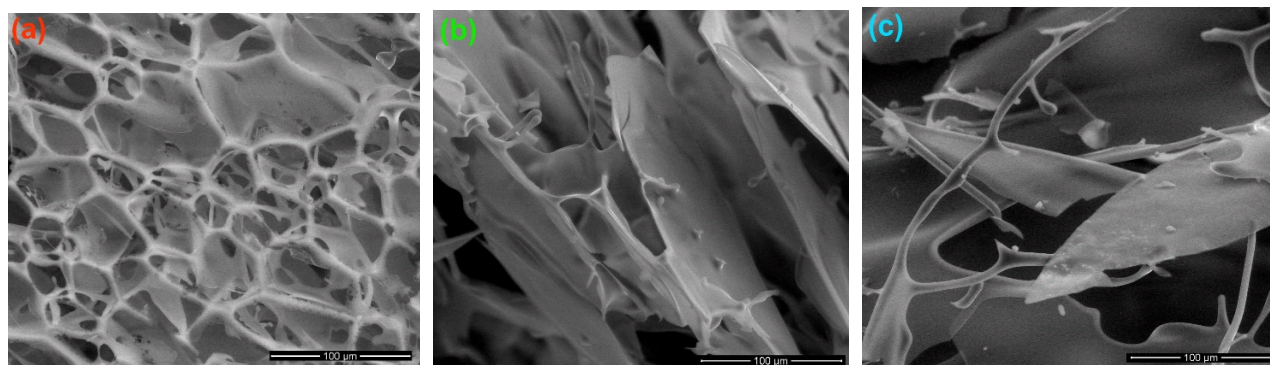

**Figure S4.** SEM micrograph of the prepared (a) Eu(III) aerogel, (b) Tb(III) aerogel, (c) La(III) aerogel at higher magnification (1000x).
